# Supplementary material
Source: MDPI journal article supplement (https://www.mdpi.com/2073-4441/13/19/2710)
Supplement: s1 [file s1]

# Effect of Physical Characteristics and Hydrodynamic Conditions on Transport and Deposition of Microplastics in Riverine Ecosystem

Rakesh Kumar<sup>1</sup>, Prabhakar Sharma<sup>1\*</sup>, Anurag Verma<sup>1</sup>, Prakash Kumar Jha<sup>2</sup>, Prabhakar Singh<sup>3</sup>, Pankaj Kumar Gupta<sup>4</sup>, Ravish Chandra<sup>5,6</sup> and P.V. Vara Prasad<sup>2</sup>

<sup>1</sup> School of Ecology and Environment Studies, Nalanda University, Rajgir 803116, Bihar, India; rakesh.kumar.phd@nalandauniv.edu.in (R.K.), psharma@nalandauniv.edu.in (P.S.), anurag.verma.phd@nalandauniv.edu.in (A.V.)

<sup>2</sup> Sustainable Intensification Innovation Lab; and Department of Agronomy, Kansas State University, Manhattan, KS 66506, USA; pjha@ksu.edu (P.K.J.), vara@ksu.edu (P.V.V.P.)

<sup>3</sup> Ecole Centrale School of Engineering, Mahindra University, Hyderabad 500043, Telanagana, India; Prabhakar.Singh@mahindrauniversity.edu.in

<sup>4</sup> Faculty of Environment, University of Waterloo, Waterloo, ON, N2L 3G1, Canada; pk3gupta@uwaterloo.ca

<sup>5</sup> Department of Soil & Water Engineering, Dr Rajendra Prasad Central Agricultural University, Pusa 848125, Bihar, India; ravish@rpcau.ac.in

<sup>6</sup> Centre of Excellence on Water Management, Dr Rajendra Prasad Central Agricultural University, Pusa 848125, Bihar, India; ravish@rpcau.ac.in

\* Correspondence: psharma@nalandauniv.edu.in

Table S1. Sources and effect of environmental conditions on the aggregations of microplastics.

| River                     | Sources        | Environmental conditions                                                                                                                                                   | Governing Processes               | References |
|---------------------------|----------------|----------------------------------------------------------------------------------------------------------------------------------------------------------------------------|-----------------------------------|------------|
| Austrian Danube, Austria  | Urban effluent | Different flow rate from 980 m <sup>3</sup> s <sup>-1</sup> to 5130 m <sup>3</sup> s <sup>-1</sup>                                                                         | Turbulent mixing                  | [46]       |
| Thames, England           | Urban effluent | Different flow rates                                                                                                                                                       | Sedimentation and remobilization  | [66]       |
| Yangtze, China            | Urban effluent | River flow and tidal wave                                                                                                                                                  | Suspension and Sedimentation      | [171]      |
| Tame, UK                  | Urban effluent | River Flow and lake                                                                                                                                                        | River flow rate and Sedimentation | [11]       |
| Tapi-Phumduang, Thailand  | Urban effluent | High and low tidal cycles                                                                                                                                                  | Suspension and Sedimentation      | [172]      |
| Brisbane River, Australia | Urban effluent | clay (<0.002 mm), silt (0.002–0.063 mm), fine sand (0.063–0.20 mm), sand (0.20–0.63 mm), and coarse sand (>0.63 mm) Clay particles had the highest microplastics abundance | Sediment properties               | [173]      |
| 29 Japanese Rivers        | Urban effluent | High concentration of microplastics found at following environmental conditions pH (7-8),                                                                                  | Water pollution loads             | [174]      |

|                                   |                |                                                                                                                                                                                                                                    |                            |       |
|-----------------------------------|----------------|------------------------------------------------------------------------------------------------------------------------------------------------------------------------------------------------------------------------------------|----------------------------|-------|
|                                   |                | suspended solids (0-10 mg L <sup>-1</sup> ), dissolved oxygen (9 mg L <sup>-1</sup> ), biochemical oxygen demand (2.5 mg L <sup>-1</sup> ), total nitrogen (2-3 mg L <sup>-1</sup> ), and total phosphorus (1 mg L <sup>-1</sup> ) |                            |       |
| Solimões, Negro and Amazon rivers | Urban effluent | Erosion susceptibility, flow velocities                                                                                                                                                                                            | Resuspension               | [175] |
| Irwell, UK                        | Urban effluent | Flood with peak discharge between 400-500 m <sup>3</sup> s <sup>-1</sup>                                                                                                                                                           | Remobilization             | [53]  |
| Dahan, & its tributaries, Taiwan  | Urban effluent | Precipitations (0-40 mm)                                                                                                                                                                                                           | Mobilization and transport | [176] |
